# Supplementary material for: Candidate mechanisms of acquired resistance to first-line osimertinib in EGFR-mutated advanced non-small cell lung cancer
Source: PubMed Central journal article supplement (PMC9971254; doi:10.1038/s41467-023-35961-y), 2023-02-27
Supplement: 41467_2023_35961_MOESM1_ESM.pdf [file 41467_2023_35961_MOESM1_ESM.pdf]

**Supplementary Table 1 – Statistical analysis of the frequency of co-occurring mutations detectable in plasma at acquired resistance (FLAURA resistance analysis subset)**

| Aberration, n      | Osimertinib (n=109) |                       | Comparator EGFR-TKI (n=145) |                     | p-value (Fisher) | p-value (Bonferroni) | Fisher Odds* |
|--------------------|---------------------|-----------------------|-----------------------------|---------------------|------------------|----------------------|--------------|
|                    | Mutation detected   | Mutation not detected | Osimertinib                 | Comparator EGFR-TKI |                  |                      |              |
| T790M              | 0                   | 109                   | 64                          | 81                  | 0                | 0                    | 0            |
| EGFR mutations     | 11                  | 98                    | 2                           | 143                 | 0.0026           | 0.026                | 7.97         |
| MET amplification  | 17                  | 92                    | 9                           | 136                 | 0.0204           | 0.204                | 2.78         |
| HER2 amplification | 2                   | 107                   | 3                           | 142                 | 1                | 1                    | 0.89         |
| RET                | 0                   | 109                   | 2                           | 143                 | 0.5081           | 1                    | 0            |
| ALK                | 1                   | 108                   | 0                           | 145                 | 0.4291           | 1                    | Inf          |
| MAPK               | 6                   | 103                   | 4                           | 141                 | 0.3345           | 1                    | 2.05         |
| PIK3CA             | 6                   | 103                   | 3                           | 142                 | 0.1782           | 1                    | 2.75         |
| Cell cycle         | 12                  | 97                    | 8                           | 137                 | 0.1565           | 1                    | 2.11         |

| Aberration, n      | Mutation detected |            | Mutation not detected |            | p-value (Fisher) | p-value (Bonferroni) | Fisher Odds* |
|--------------------|-------------------|------------|-----------------------|------------|------------------|----------------------|--------------|
|                    | Osimertinib       | Comparator | Osimertinib           | Comparator |                  |                      |              |
|                    | n=109             | n=145      | n = 109               | n = 145    |                  |                      |              |
| T790M              | 0                 | 64         | 109                   | 81         | 0                | 0                    | 0            |
| EGFR mutations     | 11                | 2          | 98                    | 143        | 0.0026           | 0.026                | 7.97         |
| MET amplification  | 17                | 9          | 92                    | 136        | 0.0204           | 0.204                | 2.78         |
| HER2 amplification | 2                 | 3          | 107                   | 142        | 1                | 1                    | 0.89         |
| RET                | 0                 | 2          | 109                   | 143        | 0.5081           | 1                    | 0            |
| ALK                | 1                 | 0          | 108                   | 145        | 0.4291           | 1                    | Inf          |
| MAPK               | 6                 | 4          | 103                   | 141        | 0.3345           | 1                    | 2.05         |
| PIK3CA             | 6                 | 3          | 103                   | 142        | 0.1782           | 1                    | 2.75         |
| Cell cycle         | 12                | 8          | 97                    | 137        | 0.1565           | 1                    | 2.11         |

\*The conditional Maximum Likelihood Estimate (MLE) rather than the unconditional MLE (the sample odds ratio) is used to calculate odds ratio (fisher.test) in R. Abbreviations: EGFR, epidermal growth factor receptor

**Supplementary Fig. 1 | Comparator EGFR-TKI duration of treatment by candidate resistance mechanisms**

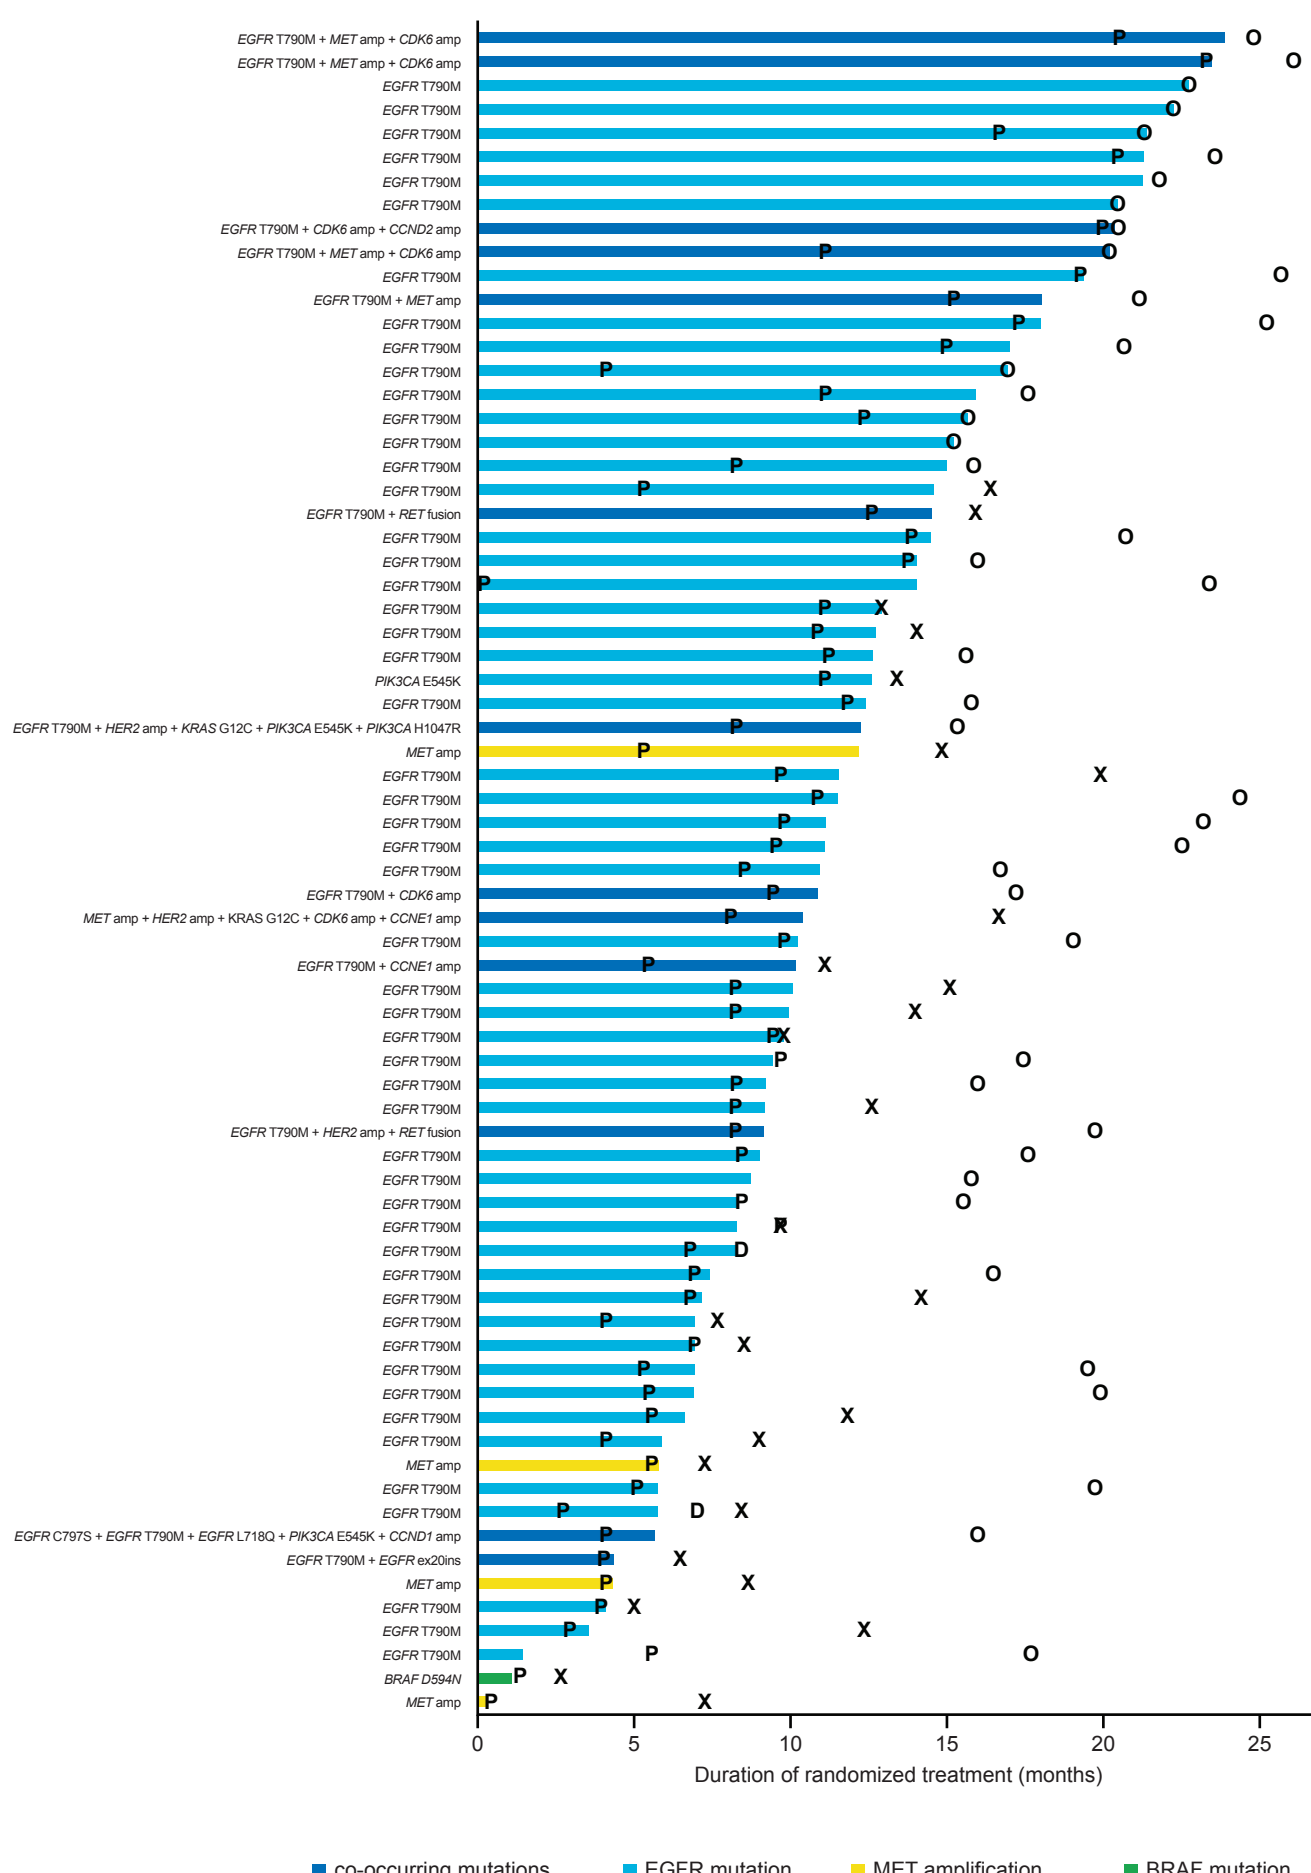

**Figure Legend:** Swimmer plot indicating duration of treatment with comparator EGFR-TKI (months) by resistance mechanisms (n=145 total, n = 71 with detected resistance mutation). Source data are provided in the Supplementary Data 1 file.

X, time of death for patients who have died; O, date last known alive for patients who have not died; P, time of progression, as assessed by investigator; D, time of study discontinuation.
