# Supplementary material for: Candidate mechanisms of acquired resistance to first-line osimertinib in EGFR-mutated advanced non-small cell lung cancer
Source: PubMed Central journal article supplement (PMC9971254; doi:10.1038/s41467-023-35961-y), 2023-02-27
Supplement: 41467_2023_35961_MOESM2_ESM.pdf [file 41467_2023_35961_MOESM2_ESM.pdf]

### **Description of Additional Supplementary Files**

**Supplementary Data 1:** this excel file contains the raw, de-identified data required to enable a reader to reproduce the results presented in the figures.
